# Supplementary material for: Source-receptor relationships for speciated atmospheric mercury at the remote Experimental Lakes Area, northwestern Ontario, Canada
Source: Copernicus journal article supplement (doi:10.5194/acp-12-1903-2012), 2012-02-17

## Supplementary Material

**Fig. S1.** Two-day HYSPLIT back trajectories for each season. **(A)** Summer05, **(B)** Fall05, **(C)** Winter06, **(D)** Spring06, **(E)** Summer06, and **(F)** Fall06. White placemarks represent Hg point sources. Winter months: December, January, February; Spring months: March, April, May; Summer months: June, July, August; Fall months: September, October, November.

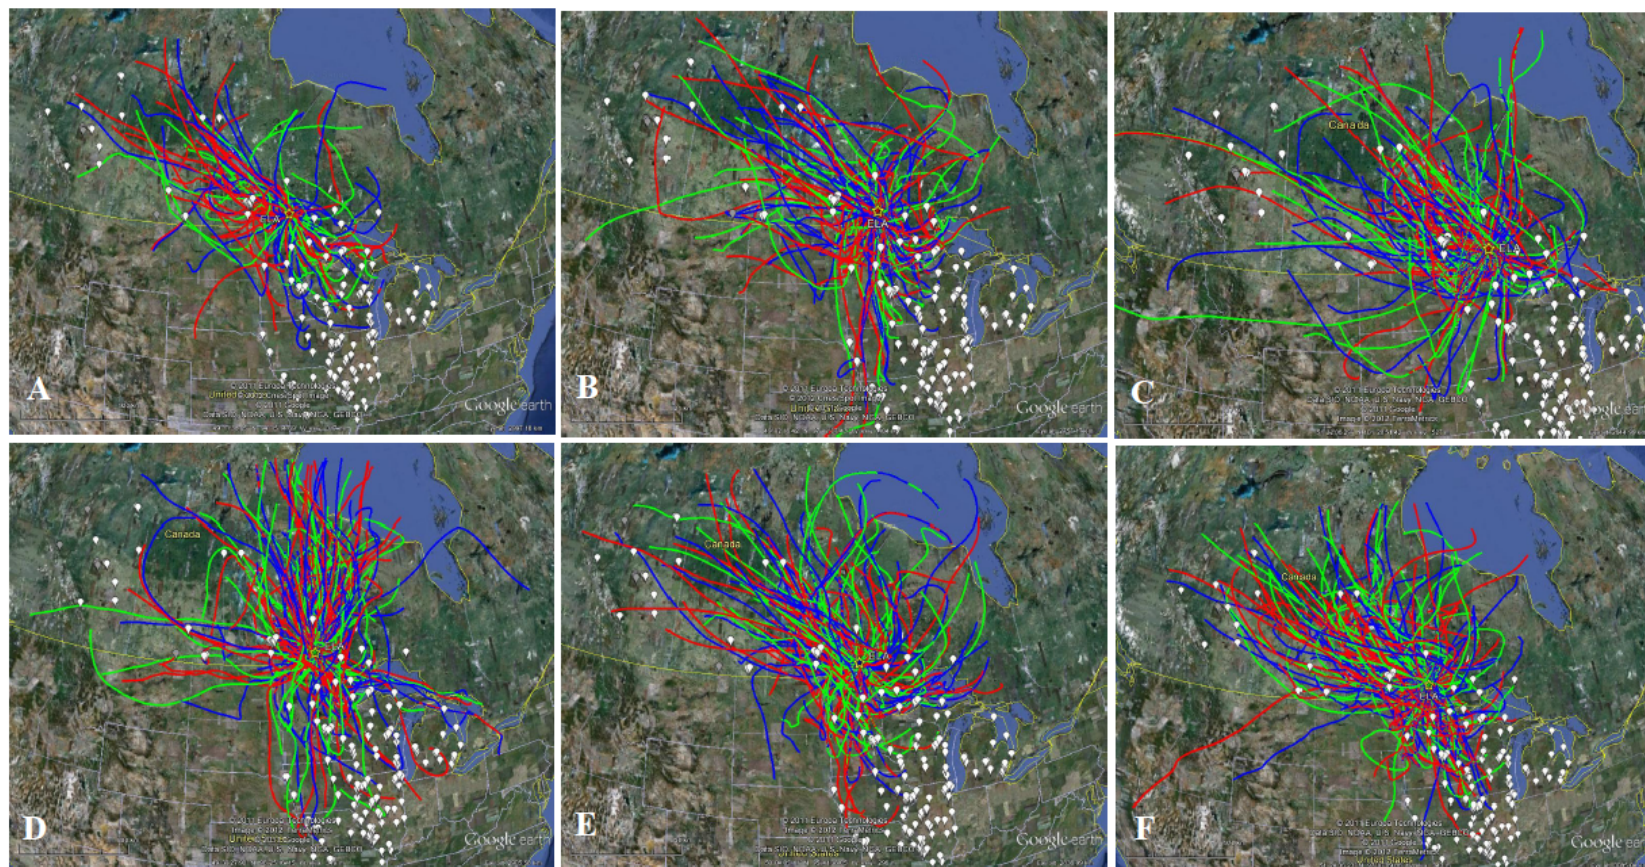

Supplement: Supplementary file 1 [file acp-12-1903-2012-supplement.pdf]
